# Supplementary material
Source: PubMed Central journal article supplement (PMC4156665)
Supplement: mmc1.pdf [file mmc1.pdf]

## The mechanism of collapse of heterogeneous lipid monolayers

Svetlana Baoukina, Dmitri Rozmanov, Eduardo Mendez-Villuendas, and D. Peter Tieleman.

### Supporting material

**Table S1. Summary of simulations performed**

| C                                      | T, K | $\gamma_m$ ,<br>mN/m | $\gamma_{m0}$ ,<br>mN/m | t,<br>$\mu$ s | phase | collapse |
|----------------------------------------|------|----------------------|-------------------------|---------------|-------|----------|
| DPPC:<br>POPG:<br>DOPC<br>3:1:1        | 310  | 23                   | 30*                     | 5             | LE    | -        |
|                                        |      | 0                    | 23                      | 10x2          | LE    | +        |
|                                        |      | -1                   | 23                      | 10            | LE    | +        |
|                                        |      | eq                   | -1                      | 5             | LE    | -        |
|                                        |      | 15                   | eq                      | 10            | LE    | +        |
|                                        | 290  | 1                    | 5*                      | 10x2          | LE+LC | -        |
|                                        |      | 0                    | 5*                      | 10x2          | LE+LC | +        |
|                                        |      | -1                   | 5*                      | 10            | LE+LC | +        |
|                                        |      | eq                   | 0; -1                   | 10x2          | LE    | -        |
|                                        |      | 15                   | eq                      | 10            | LE    | +        |
|                                        | 270  | 10                   | eq                      | 10            | LE    | +        |
|                                        |      | 23                   | 20*                     | 10            | LE+LC | -        |
|                                        |      | 0                    | 23                      | 10            | LE+LC | -        |
|                                        |      | -1                   |                         | 10            | LE+LC | +        |
|                                        |      | -2                   |                         | 10            | LE+LC | +        |
|                                        |      | eq                   | -2; -3                  | 25x4          | LE+LC | -        |
|                                        |      | 20                   | eq                      | 10            | LE+LC | +        |
|                                        |      | 15                   | eq                      | 10x2          | LE+LC | +        |
|                                        | 10   | eq, 15               | 10x2                    | LE+LC         | +     |          |
|                                        | 5    | eq, 10               | 10x2                    | LE+LC         | +     |          |
| DPPC:<br>DOPC:<br>cholesterol<br>5:3:4 | 290  | 4                    | 30*;5*                  | 10            | Ld+Lo | +        |
|                                        |      | 3                    |                         | 10x2          | Ld+Lo | +        |
|                                        |      | 2                    |                         | 10x2          | Ld+Lo | +        |
|                                        |      | 1                    |                         | 10            | Ld+Lo | +        |
|                                        |      | eq                   | 1; 2                    | 25x4          | Ld+Lo | -        |
|                                        |      | 15                   | eq                      | 10x2          | Ld+Lo | +        |
|                                        |      | 10                   |                         | 10            | Ld+Lo | +        |
|                                        |      | 5                    |                         | 10            | Ld+Lo | +        |
| POPG:<br>DOPC<br>1:1                   | 290  | 3                    | 23                      | 10x2          | LE    | -        |
|                                        |      | 2                    |                         | 10            | LE    | +        |
|                                        | 270  | 2                    | 23                      | 10x2          | LE    | -        |
|                                        |      | 1                    |                         | 10            | LE    | +        |
| DOPC                                   | 290  | 2                    | 23                      | 10x2          | Ld    | -        |
|                                        |      | 1                    |                         | 10            | Ld    | +        |

Here C is the monolayer composition, T is temperature,  $\gamma_m$  is surface tension,  $\gamma_{m0}$  is surface tension in the starting configuration, eq corresponds to the equilibrium surface tension of a monolayer in coexistence with bilayer folds (see Table 3), t is simulation time; +/- indicates whether monolayer collapse was observed on the simulation time scale; phase corresponds to the monolayers and is as follows: LE - liquid-expanded, LC – liquid-condensed, Lo – liquid-ordered, Ld - liquid-disordered. \*Simulations from ref. (56), 25  $\mu$ s long each.

**Table S2. Equilibrium surface tensions**

| <b>C</b>                        | <b>T,<br/>K</b> | <b>monolayer<br/>phase</b> | <b>bilayer<br/>phase</b> | <b><math>\gamma_{eq}</math>,<br/>mN/m</b> |
|---------------------------------|-----------------|----------------------------|--------------------------|-------------------------------------------|
| DPPC:POPG:DOPC<br>3:1:1         | 310             | LE                         | LE                       | 21.7±0.6                                  |
|                                 | 290             | LE                         | LE                       | 21.4±0.6                                  |
|                                 | 270             | LC+LE                      | LE                       | 21.5±0.3                                  |
|                                 |                 | LC+LE                      | LC+LE                    | 25.4±0.4                                  |
| DPPC:DOPC:<br>cholesterol 5:3:4 | 290             | Lo+Ld                      | Ld                       | 21.3±0.7                                  |
|                                 |                 | Lo+Ld                      | Lo+Ld                    | 23.0±0.2                                  |

Here C is the monolayer composition, T is temperature,  $\gamma_{eq}$  is the equilibrium surface tension.

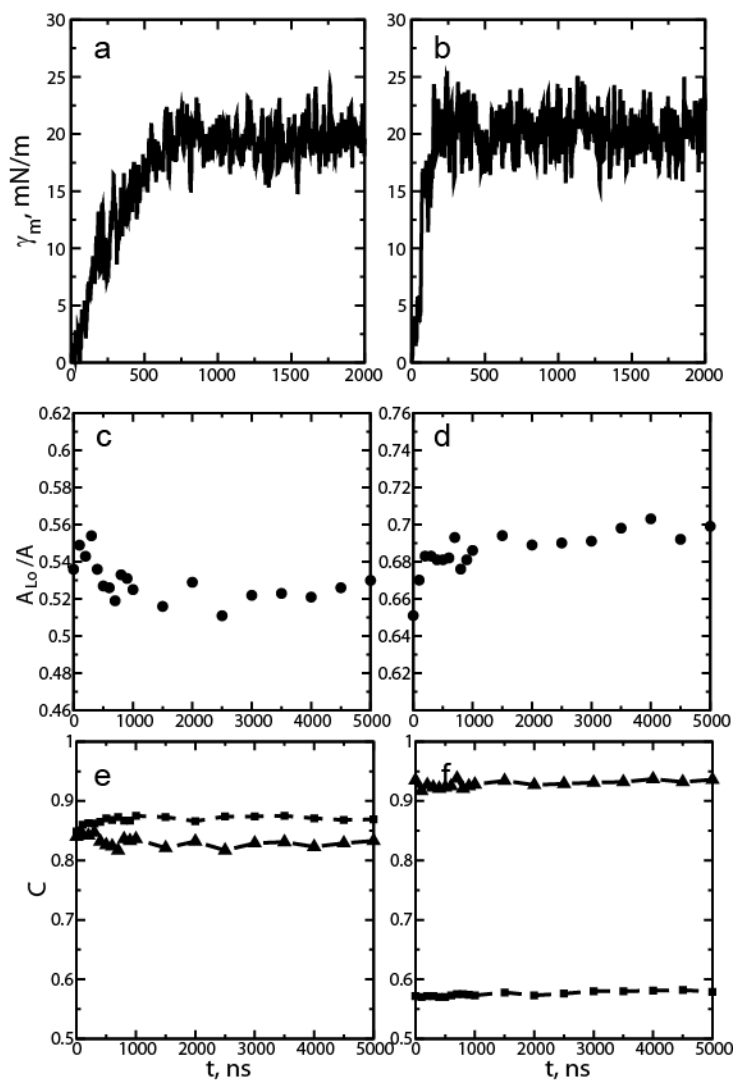

**Figure S1.** The monolayer properties as a function of time during equilibration with bilayers at constant interfacial area, for mixtures of 3:1:1 DPPC: POPG: DOPC at 270 K (left panel) and 5:3:4 DPPC: DOPC: cholesterol at 290 K (right panel). Surface tension (a,b), area fraction of the ordered phase (LC or Lo) (c,d), DPPC fraction forming the ordered phase, triangles (e,f), and DPPC concentration in the ordered phase, squares (e,f), are shown.
